# Supplementary material for: Optimizing synergistic effects: creating oxygen vacancies in NiCoWO4via a solid-state grinding method for improved energy storage performance
Source: Royal Society of Chemistry journal article supplement (doi:10.1039/d4dt02118e), 2024-01-01
Supplement: d4dt02118e1.pdf [file d4dt02118e1.pdf]

**Optimizing Synergistic Effects: Creating oxygen vacancy in NiCoWO<sub>4</sub> via solid-state grinding method for improved energy storage performance.**

**Anandhavalli Jeevarathinam, Arun Annamalai, Ramya Ravichandran, Kumaresan Annamalai, Sundaravadivel Elumalai \***

Department of Chemistry, Faculty of Engineering and Technology, SRM Institute of Science and Technology, Kattankulathur, Tamil Nadu, 603203, India

\*Corresponding author E-mail: [sundaravadivelchem@gmail.com](mailto:sundaravadivelchem@gmail.com)

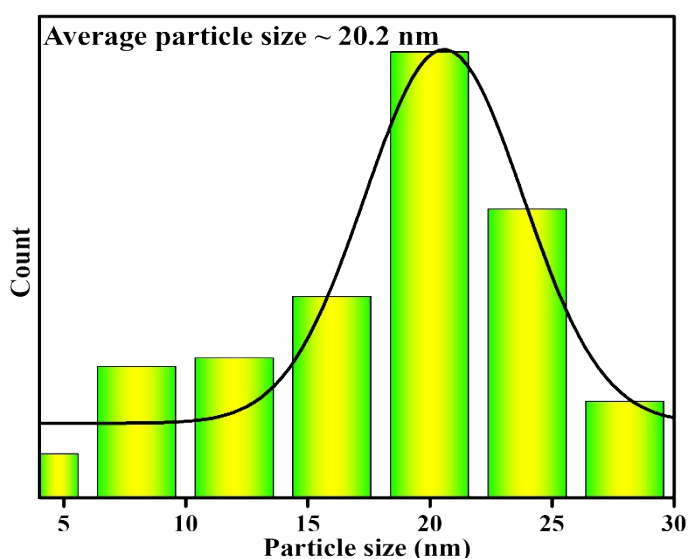

**Fig S1 (a) Average particle size of Ov-NiCoWO<sub>4</sub>**

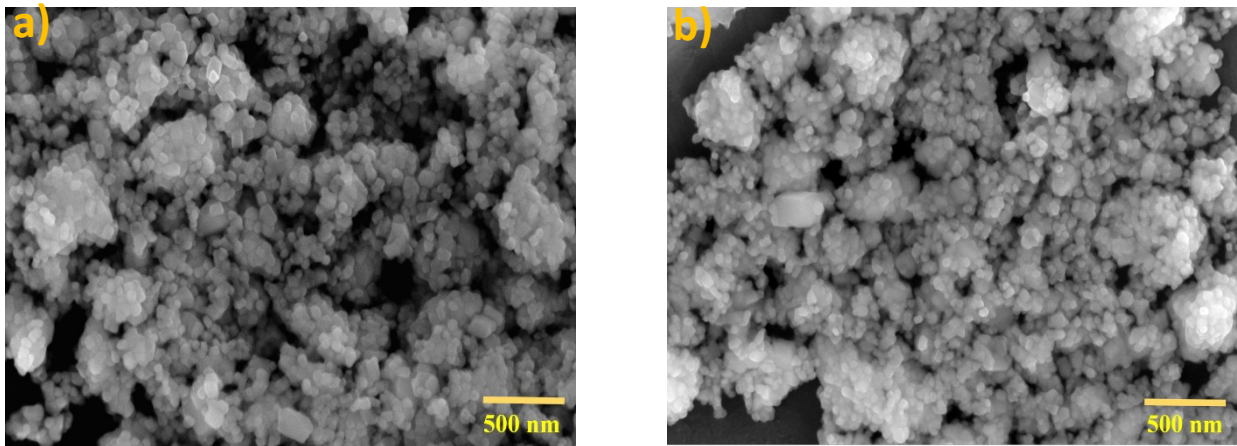

Fig S2 (a,b) SEM images of NiCoWO<sub>4</sub> and Ov-NiCoWO<sub>4</sub>

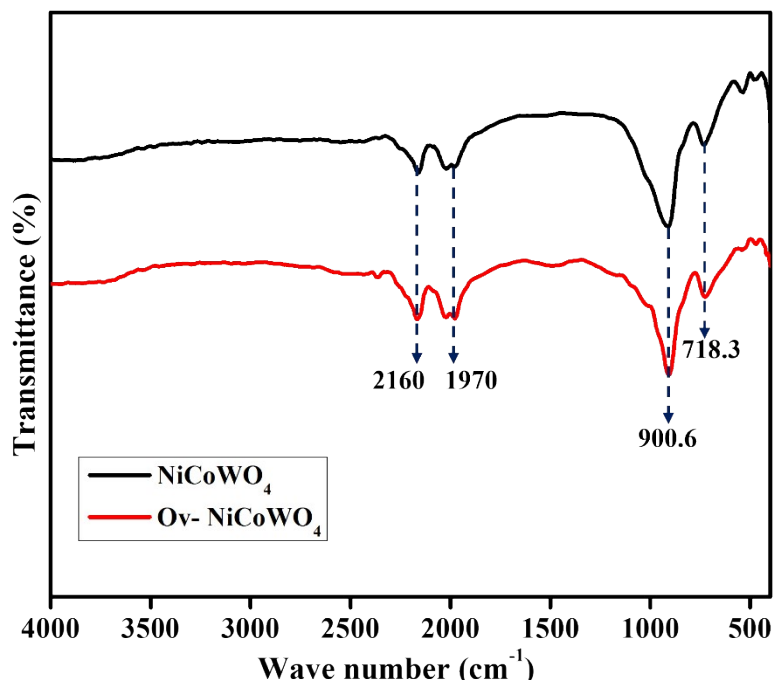

Fig S3 (a) FT-IR spectrum of NiCoWO<sub>4</sub> and Ov-NiCoWO<sub>4</sub>

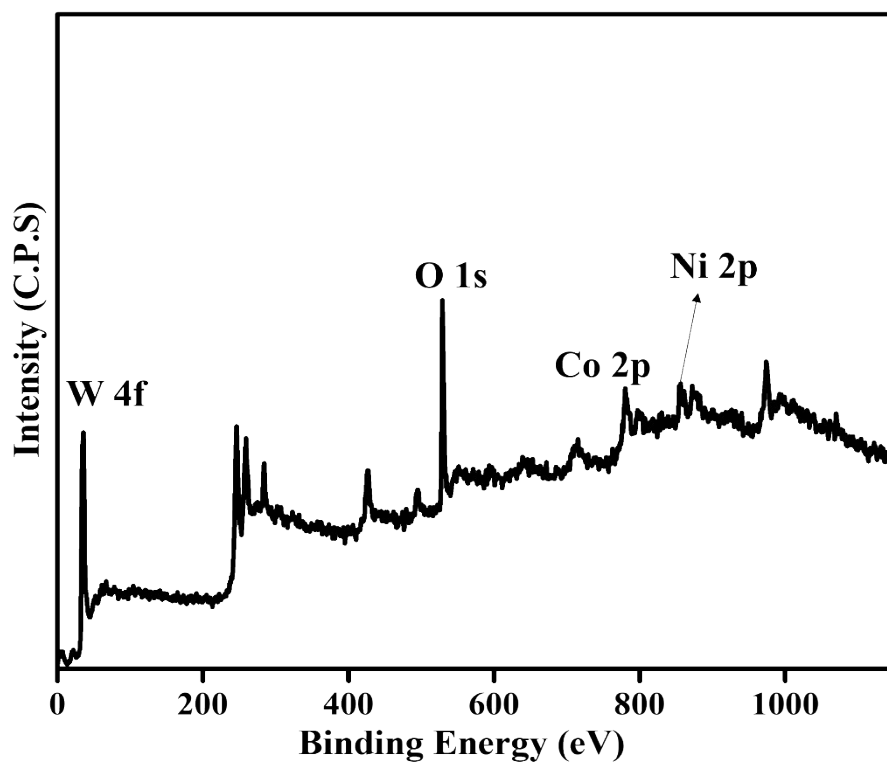

Fig S4 (a) Survey spectrum of Ov-NiCoWO<sub>4</sub>

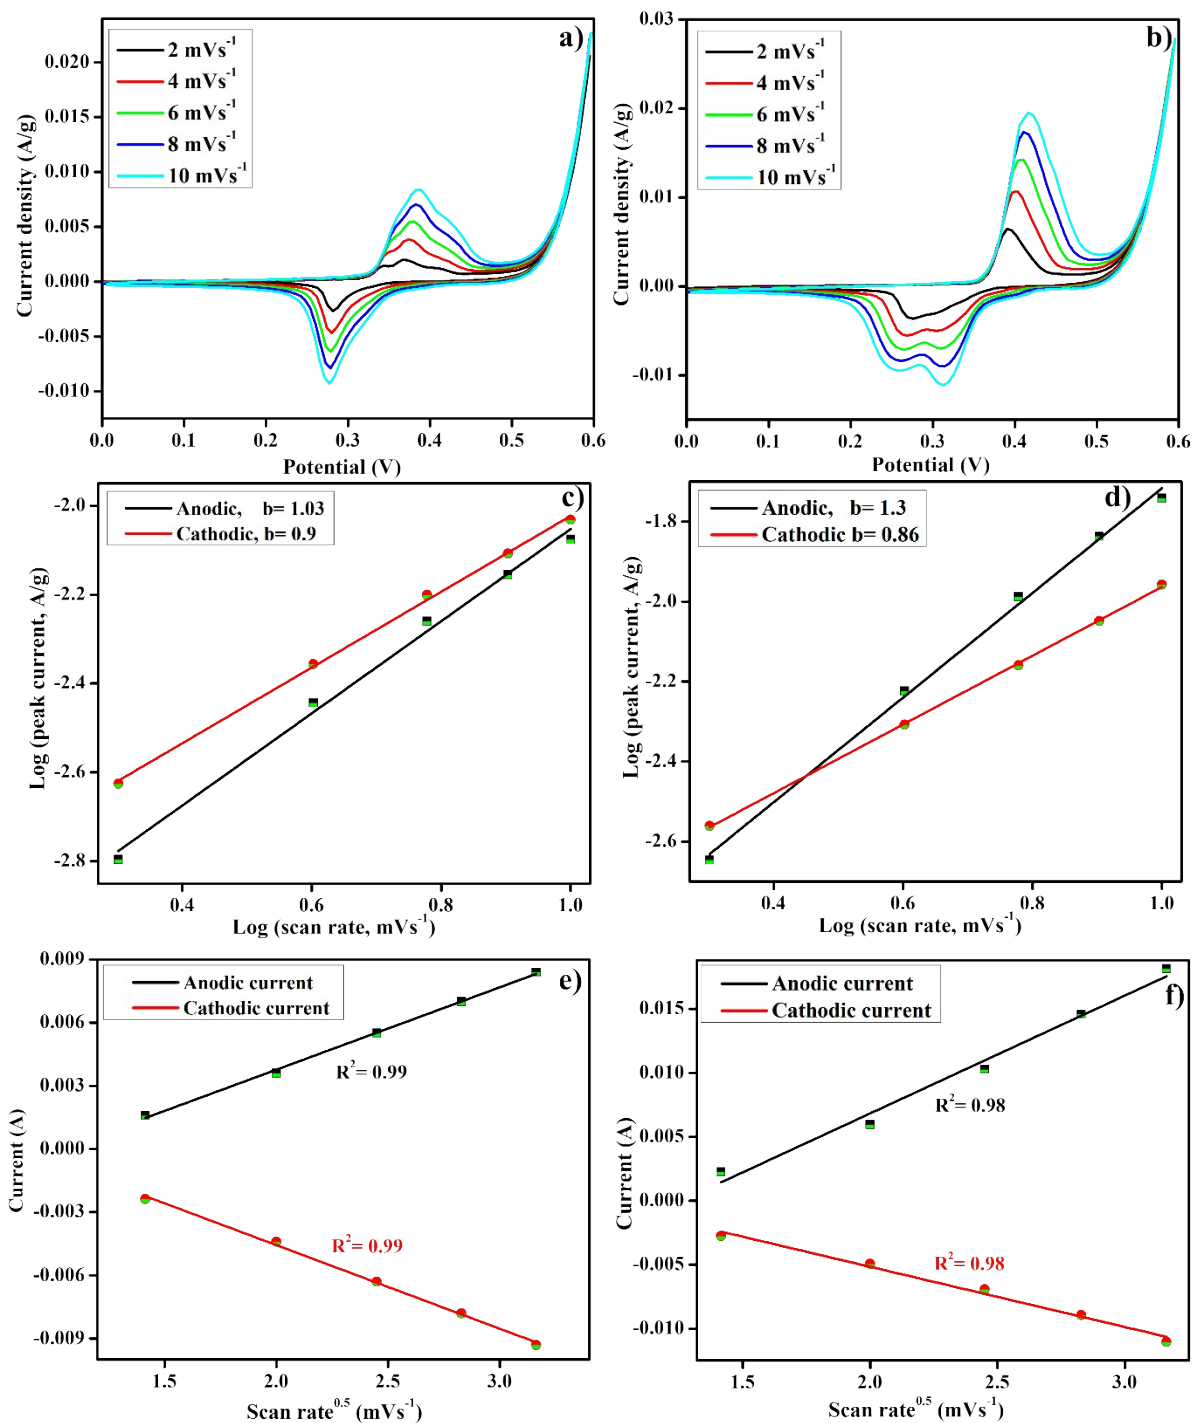

**Fig S5 (a,b) CV plots of NiCoWO<sub>4</sub> and Ov-NiCoWO<sub>4</sub> at scan rate of 2-10 mV/s, (c,d) b value of NiCoWO<sub>4</sub> and Ov-NiCoWO<sub>4</sub>. (e,f) linear plot of anodic and cathodic peak current.**

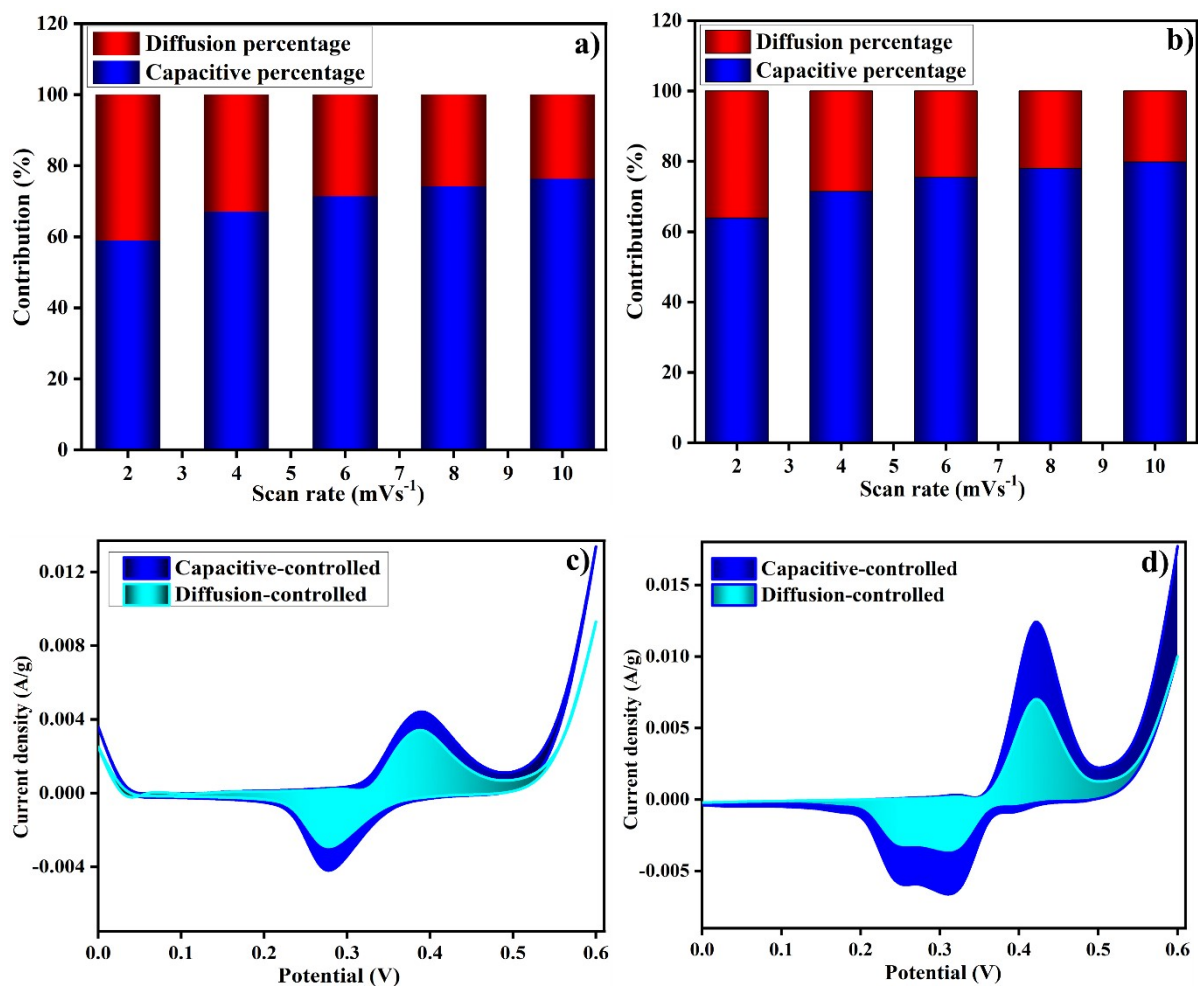

**Fig S6 (a,b) Contribution percentage of NiCoWO<sub>4</sub> and Ov-NiCoWO<sub>4</sub>. (c,d) Dunn real plot of NiCoWO<sub>4</sub> and Ov-NiCoWO<sub>4</sub> at scan rate of 10 mV/s.**

**Table S1****Comparison of specific capacitance of metal oxide-based materials:**

| <b>Material</b>                      | <b>Preparation method</b>   | <b>Surface area</b>           | <b>Electrolyte</b>                     | <b>Current density</b> | <b>Specific capacitance</b> | <b>References</b> |
|--------------------------------------|-----------------------------|-------------------------------|----------------------------------------|------------------------|-----------------------------|-------------------|
| NiCoWO <sub>4</sub>                  | <i>Wet chemical</i>         | -                             | <i>PVA/H<sub>3</sub>PO<sub>4</sub></i> | 0.8 mA                 | 862.26 mF                   | 1                 |
| NiWO <sub>4</sub>                    | Hydrothermal                | 101.48 m <sup>2</sup> /g      | 3M KOH                                 | 0.5 A/g                | 1524 F/g                    | 2                 |
| CoNiWO <sub>4</sub> -P-S-GNS         | Hydrothermal                | 94.45 m <sup>2</sup> /g       | 6M KOH                                 | 0.5 A/g                | 1298.6 F/g                  | 3                 |
| NiCoWO <sub>4</sub>                  | Hydrothermal                | 51.926 m <sup>2</sup> /g      | 3M KOH                                 | 1 A/g                  | 634.55 C/g                  | 4                 |
| FeWO <sub>4</sub>                    | Hydrothermal                | 18.059 m <sup>2</sup> /g      | 1M Na <sub>2</sub> SO <sub>4</sub>     | 0.5 A/g                | 875 F/g                     | 5                 |
| CoNiWO <sub>4</sub>                  | Hydrothermal                | 76.2 m <sup>2</sup> /g        | <i>2M KOH</i>                          | 1 A/g                  | 626.4 C/g                   | 6                 |
| CuZnWO <sub>4</sub>                  | Hydrothermal                | -                             | 6M KOH                                 | 4 A/g                  | 480 F/g                     | 7                 |
| NiWO <sub>4</sub> -CoWO <sub>4</sub> | Co-precipitation            | 150.7 m <sup>2</sup> /g       | 2M KOH                                 | 0.5 A/g                | 1967 C/g                    | 8                 |
| <b>NiCoWO<sub>4</sub></b>            | <b>Solid-state Grinding</b> | <b>48.464 m<sup>2</sup>/g</b> | <b>3M KOH</b>                          | <b>1 A/g</b>           | <b>590 F/g</b>              | <b>This work</b>  |
| <b>Ov-NiCoWO<sub>4</sub></b>         | <b>Solid-state Grinding</b> | <b>53.173 m<sup>2</sup>/g</b> | <b>3M KOH</b>                          | <b>1 A/g</b>           | <b>703.66 F/g</b>           | <b>This work</b>  |

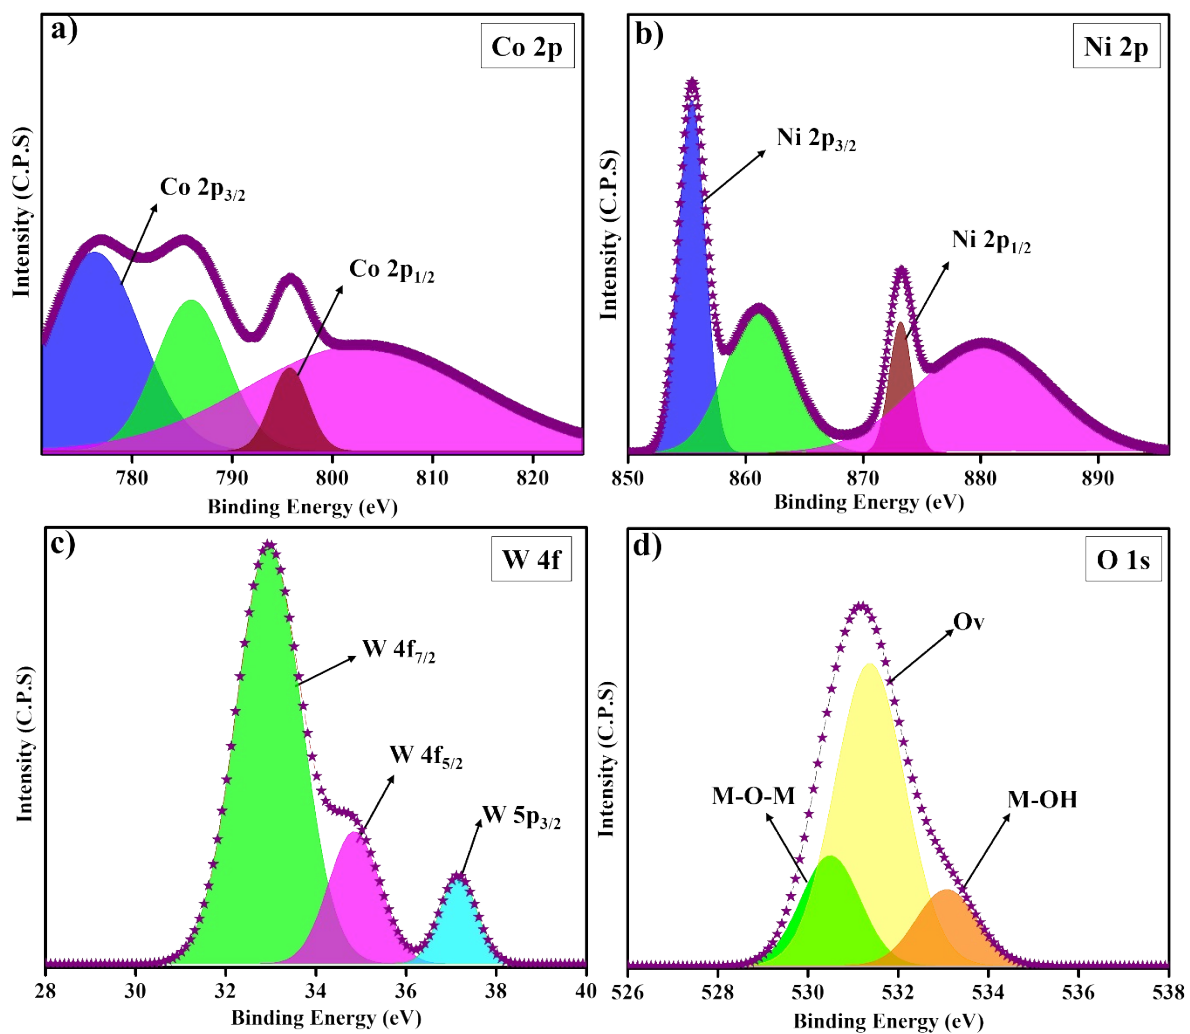

Figure S7 (a,b,c,d) XPS spectrum of Ni 2p, Co 2p, W 4f and O 1s of Ov-NiCoWO<sub>4</sub> of cycled samples

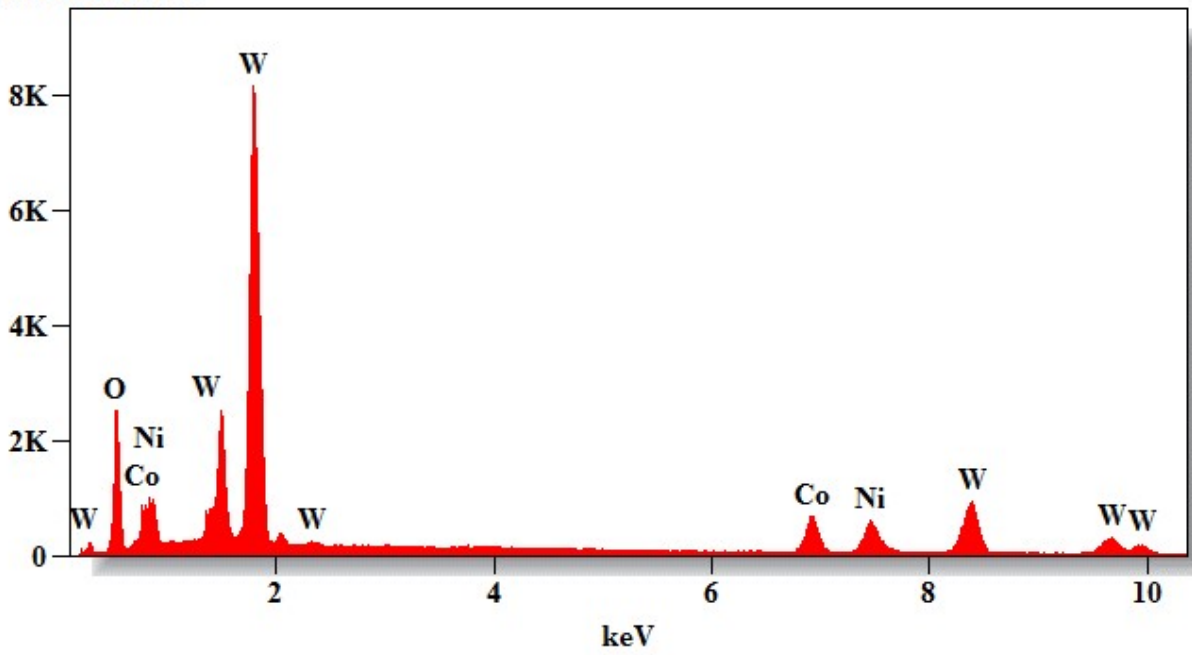

Figure S8 EDS Spectrum of Ov-NiCoWO<sub>4</sub>

| Element | Net Counts | Weight % | Atom % | Atom % Error | Formula |
|---------|------------|----------|--------|--------------|---------|
| O       | 16615      | 24.25    | 71.62  | ± 0.75       | O       |
| Co      | 10077      | 8.17     | 6.55   | ± 0.20       | Co      |
| Ni      | 9233       | 8.16     | 6.57   | ± 0.22       | Ni      |
| W       | 26806      | 59.41    | 15.27  | ± 0.31       | W       |
| Total   |            | 100.00   | 100.00 |              |         |

Table S2 Weight percentage of Ov-NiCoWO<sub>4</sub>

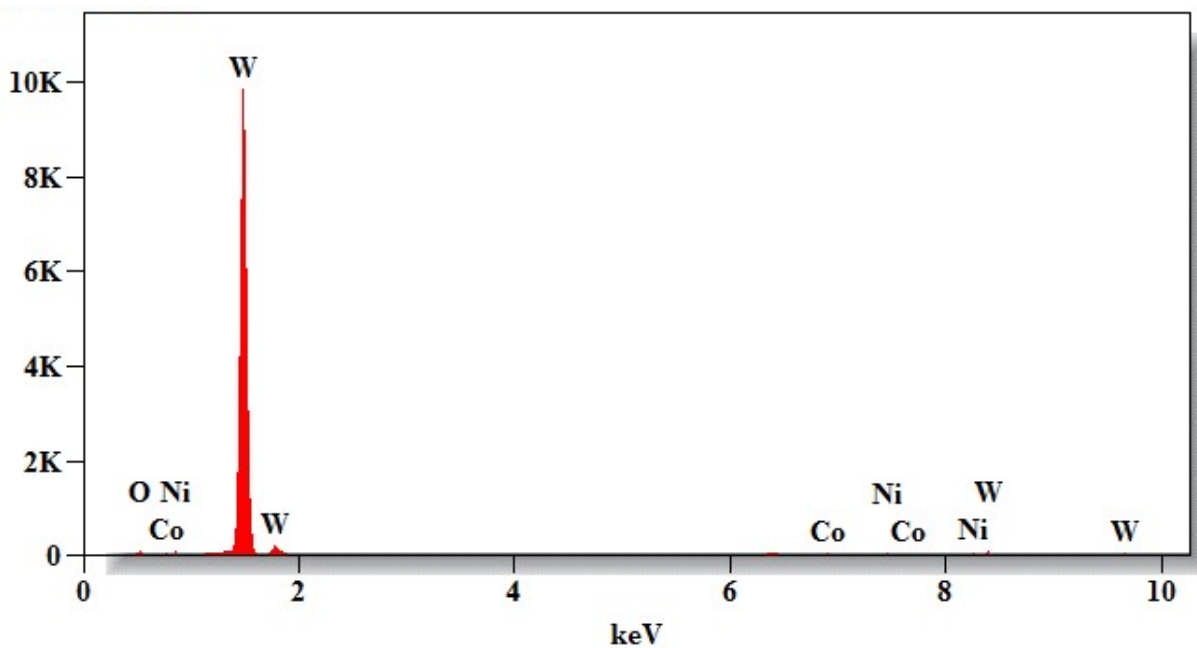



**Figure S9 EDS Spectrum of NiCoWO<sub>4</sub>**

| <i>Element</i> | <i>Net Counts</i> | <i>Weight %</i> | <i>Atom %</i> | <i>Atom % Error</i> | <i>Formula</i> |
|----------------|-------------------|-----------------|---------------|---------------------|----------------|
| <i>O</i>       | 595               | 41.85           | 84.33         | ± 4.39              | O              |
| <i>Co</i>      | 466               | 7.10            | 3.89          | ± 0.71              | Co             |
| <i>Ni</i>      | 484               | 7.59            | 4.17          | ± 0.41              | Ni             |
| <i>W</i>       | 1296              | 43.46           | 7.62          | ± 0.85              | W              |
| <i>Total</i>   |                   | 100.00          | 100.00        |                     |                |

**Table S3 Weight percentage of NiCoWO<sub>4</sub>**

## References

- 1 S. Jha, S. Mehta, E. Chen, S. S. Sankar, S. Kundu and H. Liang, *Mater Adv*, 2020, **1**, 2124–2135.
- 2 M. Ikram, Y. Javed, N. A. Shad, M. M. Sajid, M. Irfan, A. Munawar, T. Hussain, M. Imran and D. Hussain, *J Alloys Compd*, , DOI:10.1016/j.jallcom.2021.160314.
- 3 A. S. Rajpurohit, N. S. Punde, C. R. Rawool and A. K. Srivastava, *Chemical Engineering Journal*, 2019, **371**, 679–692.
- 4 S. Prabhu, C. Balaji, M. Navaneethan, M. Selvaraj, N. Anandhan, D. Sivaganesh, S. Saravanakumar, P. Sivakumar and R. Ramesh, *J Alloys Compd*, , DOI:10.1016/j.jallcom.2021.160066.
- 5 P. Sathish Kumar, P. Prakash, A. Srinivasan and C. Karuppiah, *J Power Sources*, , DOI:10.1016/j.jpowsour.2020.228892.
- 6 B. Huang, H. Wang, S. Liang, H. Qin, Y. Li, Z. Luo, C. Zhao, L. Xie and L. Chen, *Energy Storage Mater*, 2020, **32**, 105–114.
- 7 E. Dhandapani, S. Prabhu, N. Duraisamy and R. Ramesh, *Journal of Materials Science: Materials in Electronics*, 2022, **33**, 8446–8459.
- 8 Y. Wang, C. Shen, L. Niu, Z. Sun, F. Ruan, M. Xu, S. Shan, C. Li, X. Liu and Y. Gong, *Mater Chem Phys*, 2016, **182**, 394–401.
